# Supplementary material for: Sequential multiphoton absorption enhancement induced by zinc complexation in functionalized distyrylbenzene analogs
Source: Royal Society of Chemistry journal article supplement (doi:10.1039/b615076d), 2006-12-15
Supplement: b615076d.pdf [file b615076d.pdf]

## Supporting Information

for

### Sequential multiphoton absorption enhancement induced by zinc complexation in functionalized distyrylbenzene analogs

Graziano Fabbrini, Raffaele Riccò, Enzo Menna, Michele Maggini,\* Vincenzo Amendola, Mattia Garbin, Massimo Villano, Moreno Meneghetti

*Dipartimento di Scienze Chimiche, Università di Padova, Via Marzolo 1, 35131 Padova, Italy.*

\*To whom correspondence should be addressed

Phone: +39-0498275662 /Fax: +39-0498275792

Email address: michele.maggini@unipd.it

#### Contents

1. Synthetic details and characterization for compounds **4**, **5**, **7**, **9-14**  
(NMR and IR spectra for **2** and **3**)
2. Titration for stoichiometry and binding constant determination

|            |                                                                                                                                                             |
|------------|-------------------------------------------------------------------------------------------------------------------------------------------------------------|
| Figure S1  | <sup>1</sup> H NMR of <b>2</b>                                                                                                                              |
| Figure S2  | <sup>13</sup> C NMR of <b>2</b>                                                                                                                             |
| Figure S3  | <sup>1</sup> H NMR of <b>3</b>                                                                                                                              |
| Figure S4  | <sup>13</sup> C NMR of <b>3</b>                                                                                                                             |
| Figure S5  | IR spectrum of <b>2</b>                                                                                                                                     |
| Figure S6  | IR spectrum of <b>3</b>                                                                                                                                     |
| Figure S7  | ESI-MS of <b>2</b>                                                                                                                                          |
| Figure S8  | ESI-MS of <b>3</b>                                                                                                                                          |
| Figure S9  | ESI-MS of <b>2-Zn<sup>2+</sup></b> complex                                                                                                                  |
| Figure S10 | ESI-MS of <b>3-Zn<sup>2+</sup></b> complex                                                                                                                  |
| Figure S11 | Fluorescence spectral changes observed upon the addition of Zn <sup>2+</sup> to <b>2</b> and <b>3</b><br>(stoichiometry and binding constant determination) |

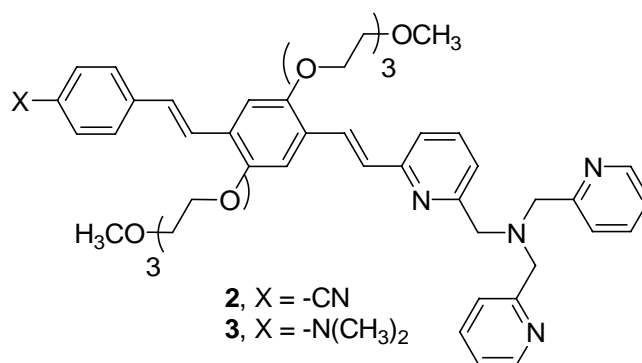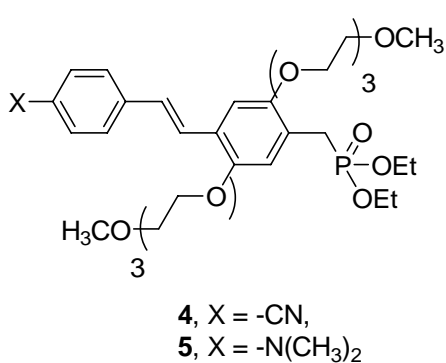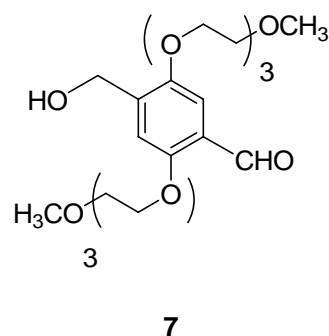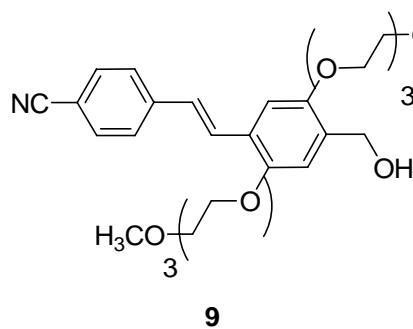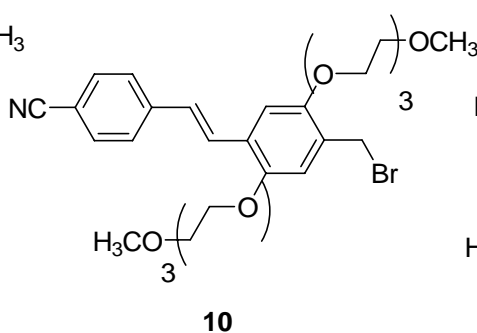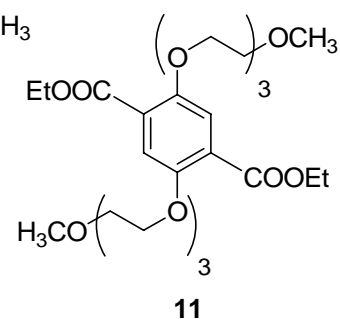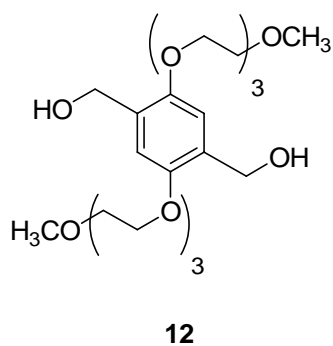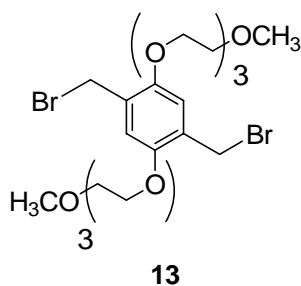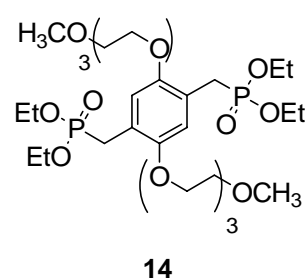

**Phosphonate 4.** Bromobenzyl derivative **10** (147 mg, 0.24 mmol) and triethylphosphite (213 mg, 1.28 mmol) were brought to 150 °C for 3 h. The crude product was purified by flash column chromatography (SiO<sub>2</sub>, eluent: ethyl acetate/petroleum ether 1:1, then ethyl acetate/ethanol 9:1).

139 mg (87%) of **10** were isolated as a yellow-green oil.  $^1\text{H-NMR}$  (250 MHz,  $\text{CDCl}_3$ )  $\delta$  7.65-7.56 (m, 4H), 7.59-7.52 (d, 1H,  $J_{\text{trans}} = 16.5$  Hz), 7.31-7.7.06 (d, 1H,  $J_{\text{trans}} = 16.5$  Hz), 7.11 (s, 1H), 6.98 (s, 1H), 4.20-4.15 (m, 4H), 4.11-4.3.99 (m, 4H), 3.90.3.85 (m, 4H), 3.80-3.62 (m, 12H), 3.57-3.50 (m, 4H), 3.37 (s, 3H), 3.35 (s, 3H), 3.30-3.22 (d, 2H,  $J = 21.5$  Hz), 1.29-1.23 (t, 6H,  $J = 7.2$  Hz);  $^{13}\text{C-NMR}$  (62.9 MHz,  $\text{CDCl}_3$ )  $\delta$  151.22-151.10 (d,  $J_{\text{CP}} = 7.4$  Hz), 150.97, 143.76, 142.57, 132.54, 127.36-127.33 (d,  $J_{\text{CP}} = 1.8$  Hz), 127.33-126.96 (d,  $J_{\text{CP}} = 6.9$  Hz), 125.36-125.29 (d,  $J_{\text{CP}} = 4.1$  Hz), 122.75-122.59 (d,  $J_{\text{CP}} = 9.7$  Hz), 119.25, 116.54-116.45 (d,  $J_{\text{CP}} = 5.5$  Hz), 110.90-110.84 (d,  $J_{\text{CP}} = 3.2$  Hz), 110.31, 72.03-72.01 (d,  $J_{\text{CP}} = 1.3$  Hz), 70.92, 70.90, 70.78, 70.68, 69.99, 69.88, 69.09, 62.16-62.06 (d,  $J_{\text{CP}} = 6.4$  Hz), 59.12, 27.90-25.69 (d,  $J_{\text{CP}} = 138.0$  Hz), 16.58-16.49 (d,  $J_{\text{CP}} = 6.0$  Hz); IR (KBr)  $\nu$  2870 ( $\nu$  C-H), 2222 ( $\nu$  C $\equiv$ N), 1409 ( $\nu$  C=C-H), 1243 ( $\nu$  O-P=O), 1199 ( $\nu$  P-O-C), 1058 ( $\nu_s$  C-O-C)  $\text{cm}^{-1}$ ; ESI-MS:  $\text{C}_{34}\text{H}_{50}\text{NO}_{11}\text{P}$  ( $m/z$ ): 680  $[\text{M} + \text{H}]^+$ .

**Phosphonate 5.** To a solution of bis-phosphonate **14** (430 mg, 0.61 mmol) and 4-(N,N-dimethylamino)benzaldehyde (91 mg, 0.61 mmol) in 15 ml of dry DMF at 0 °C, a suspension of *t*BuOK (68 mg, 0.61 mmol) in 5 ml of dry DMF was added dropwise over a period of 15 min under a nitrogen atmosphere. When the addition was complete, the mixture was stirred at room temperature for 12 h. The mixture was diluted with water (30 ml) and extracted with  $\text{CH}_2\text{Cl}_2$  (3 x 30 ml). The combined organic layers were dried over anhydrous  $\text{Na}_2\text{SO}_4$  and the solvent was removed under reduced pressure. The crude product purified by flash column chromatography ( $\text{SiO}_2$ , eluent: ethyl acetate/toluene/ethanol 6:4:1). 100 mg (24%) of **5** were isolated as an orange oil.  $^1\text{H-NMR}$  (250 MHz,  $\text{CDCl}_3$ )  $\delta$  7.35-7.32 (d, 2H,  $J = 8.7$  Hz), 7.08-7.03 (d, 1H,  $J_{\text{trans}} = 16.6$  Hz), 6.84-6.77 (d, 1H,  $J_{\text{trans}} = 16.6$  Hz), 6.96 (s, 1H), 6.85 (s, 1H), 6.68-6.64 (d, 2H,  $J = 8.5$  Hz), 4.10-3.93 (m, 8H), 3.82-3.80 (m, 4H), 3.70-3.55 (m, 12H), 3.43-3.40 (m, 4H), 3.29 (s, 3H), 3.27 (s, 3H), 3.21-3.12 (d, 2H,  $J = 21.7$  Hz), 2.91 (s, 6H), 1.20-1.15 (t, 6H,  $J = 7.0$  Hz);  $^{13}\text{C-NMR}$  (62.9 MHz,  $\text{CDCl}_3$ )  $\delta$  150.92, 150.04, 149.98, 129.82, 128.89, 127.49, 116.41-116.32 (d,  $J_{\text{CP}} = 5.3$  Hz), 115.90-115.82 (d,  $J_{\text{CP}} = 5.3$  Hz), 114.16-114.11 (d,  $J_{\text{CP}} = 2.9$  Hz), 112.56, 111.94, 109.87-109.82 (d,  $J_{\text{CP}} = 3$  Hz), 71.82-71.80 (d,  $J_{\text{CP}} = 1.9$  Hz), 70.78, 70.70, 70.57, 70.50, 70.43, 70.42. 69.84, 69.77, 69.63, 69.11, 68.77, 61.91, 61.80, 40.52, 27.52-25.31 (d,  $J_{\text{CP}} = 138$  Hz), 16.36-16.27 (d,  $J_{\text{CP}} = 5.6$  Hz); IR (KBr)  $\nu$  ( $\text{cm}^{-1}$ ): 2923 ( $\nu$  C-H), 1415 ( $\nu$  C=C-H), 1351 ( $\nu$  C-N), 1249 ( $\nu$  O-P=O), 1207 ( $\nu$  P-O-C), 1053 ( $\nu_s$  C-O-C), 959 ( $\delta$  C=C-H)  $\text{cm}^{-1}$ ; ESI-MS  $\text{C}_{35}\text{H}_{56}\text{NO}_{11}\text{P}$  ( $m/z$ ) = 720  $[\text{M} + \text{Na}]^+$ .

**Aldehyde-alcohol 7.** To a solution of bis-alcohol **12** (5.00 g, 10.8 mmol) in 500 ml of  $\text{CH}_2\text{Cl}_2$  at 0 °C, a suspension of DDQ (2.45 g, 10.8 mmol) in 300 ml of  $\text{CH}_2\text{Cl}_2$  was added dropwise over a period of 2 h. When the addition was complete, the mixture was stirred at room temperature for 12

h. The mixture was filtered and the filtrate was concentrated under reduced pressure and the residue purified by flash column chromatography (SiO<sub>2</sub>, eluent: ethyl acetate/ethanol 9:1). 4.47 g (90%) of **7** were isolated as a yellow oil. Elemental analysis calculated for C<sub>22</sub>H<sub>36</sub>O<sub>10</sub>: C = 57.38, H = 7.88; found: C = 57.37, H = 7.85. <sup>1</sup>H-NMR (250 MHz, CDCl<sub>3</sub>) δ 10.43 (s, 1H), 7.27 (s, 1H), 7.08 (s, 1H), 4.69 (s, 2H), 4.25-4.15 (m, 4H), 3.89-3.80 (m, 4H), 3.71-3.61 (m, 12H), 3.56-3.52 (m, 4H), 3.37 (s, 6H); <sup>13</sup>C-NMR (62.9 MHz, CDCl<sub>3</sub>) δ 189.35, 156.53, 150.54, 139.63, 124.22, 113.73, 110.05, 71.93, 70.90, 70.70, 70.62, 70.58, 70.54, 69.71, 69.51, 68.98, 68.52, 61.13, 59.04, 59.01; IR (KBr) 3447 (ν O-H), 2874 (ν C-H), 1676 (ν C=O), 1206 (δ C-H, δ O-H), 1057 (ν C-O-C) cm<sup>-1</sup>.

**Stylbene 9.** To a solution of 4-cyanobenzyl-diethylphosphonate **8** (275 mg, 1.08 mmol) in 20 ml of dry THF at 0 °C, NaH (105 mg, 2.62 mmol) was added under a nitrogen atmosphere, and the resulting solution was stirred for 15 min. Then, a solution of tris(pyridyl)amino aldehyde-alcohol **7** (500 mg, 1.08 mmol) in 10 ml of dry THF was added and the mixture was stirred at room temperature for 3 h. The solvent was removed under reduced pressure and the crude product purified by flash column chromatography (SiO<sub>2</sub>, eluent: toluene/ethyl acetate/ethanol 4:5:1). 449 mg (74%) of **9** were isolated as a yellow oil. <sup>1</sup>H-NMR (250 MHz, CDCl<sub>3</sub>) δ 7.59-7.52 (d, 1H, *J*<sub>trans</sub> = 16.2 Hz), 7.59-7.57 (m, 4H), 7.10-7.04 (d, 1H, *J*<sub>trans</sub> = 16.2 Hz), 7.07 (s, 1H), 6.97 (s, 1H), 4.65 (s, 2H), 4.17-4.14 (t, 4H, *J* = 8.7 Hz), 3.86-3.82 (t, 4H, *J* = 8.6 Hz), 3.72-3.61 (m, 12H), 3.52-3.50 (m, 4H), 3.34 (s, 3H), 3.32 (s, 3H); <sup>13</sup>C-NMR (62.9 MHz, CDCl<sub>3</sub>) δ 150.98, 150.59, 142.25, 132.37, 132.10, 126.94, 126.57, 126.44, 124.91, 118.82, 113.80, 110.37, 109.80, 71.62, 70.47, 70.41, 70.31, 70.24, 70.21, 69.59, 69.44, 68.84, 68.49, 60.57, 58.60; IR (KBr) 3456 (ν O-H), 2875 (ν C-H), 2222 (ν C≡N), 1418 (ν C=C-H), 1199 (δ O-H), 1060 (ν<sub>s</sub> C-O-C), 967 (δ C=C-H) cm<sup>-1</sup>; ESI-MS: C<sub>30</sub>H<sub>41</sub>NO<sub>9</sub> (m/z) = 582 [M + Na]<sup>+</sup>.

**Bromobenzyl stylbene 10.** To a solution of *trans*-stylbene **9** (420 mg, 0.75 mmol) in 20 ml of dry THF at 0 °C under a nitrogen atmosphere, a solution of PBr<sub>3</sub> (244 mg, 0.90 mmol) in 10 ml of dry THF was added dropwise over a period of 10 min. The resulting solution was stirred for 1 h at 0 °C. The solvent was removed under reduced pressure and the crude product purified by flash column chromatography (SiO<sub>2</sub>, eluent: ethyl acetate). 390 mg (84%) of **10** were isolated as a yellow-green oil. <sup>1</sup>H-NMR (250 MHz, CDCl<sub>3</sub>) δ 7.65-7.58 (m, 4H), 7.58-7.51 (d, 1H, *J*<sub>trans</sub> = 16.7 Hz), 7.14-7.08 (d, 1H, *J*<sub>trans</sub> = 16.7 Hz), 7.11 (s, 1H), 6.94 (s, 1H), 4.57 (s, 2H), 4.25-4.15 (m, 4H), 3.93-3.87 (m, 4H), 3.78-3.62 (m, 12H), 3.57-3.50 (m, 4H), 3.37 (s, 3H), 3.35 (s, 3H); <sup>13</sup>C-NMR (62.9 MHz, CDCl<sub>3</sub>) δ 151.29, 151.07, 142.34, 132.56, 128.08, 127.92, 127.43, 127.09, 127.01, 119.20, 116.17, 111.11, 110.57, 72.05, 72.01, 71.04, 70.93, 70.82, 70.80, 70.70, 70.68, 69.91, 69.29, 69.15, 59.13, 28.87; IR

(KBr) 2922 ( $\nu$  C-H), 2222 ( $\nu$  C $\equiv$ N), 1414 ( $\nu$  C=C-H), 1321 ( $\delta$  CH<sub>2</sub>-Br), 1060 ( $\nu$ <sub>s</sub> C-O-C), 953 ( $\delta$  C=C-H) cm<sup>-1</sup>; ESI-MS: C<sub>30</sub>H<sub>40</sub>NO<sub>8</sub>Br (m/z) = 542 [M - Br]<sup>+</sup>.

**Bis-ester 11.** To a solution of 2,5-bis(ethoxymethyl)benzene-1,4-diol diethyl 2,5-dihydroxyterephthalate (10.17 g, 40 mmol) in 70 ml of dry DMF, anhydrous K<sub>2</sub>CO<sub>3</sub> (18.20 g, 132 mmol) was added under a nitrogen atmosphere, and the resulting mixture was stirred at 60°C for 15 min. Then, 2-(2-(2-methoxy)-ethoxy)ethyl-*p*-toluensulphonate (28.06 g, 88 mmol) was added under a nitrogen atmosphere and the mixture was stirred at 60°C for 48 h. The solvent was removed under reduced pressure and the residue dissolved in CH<sub>2</sub>Cl<sub>2</sub> (150 ml) and washed with 1 M NaOH solution (3 x 150 ml), 1 M HCl solution (3 x 150 ml) and then with water (3 x 150 ml). The solution was dried over anhydrous MgSO<sub>4</sub> and the solvent was removed under reduced pressure. 21.0 g (96%) of **11** were isolated as a colorless oil. A.E. calculated for C<sub>26</sub>H<sub>42</sub>O<sub>12</sub> (546.6) C = 57.14, H = 7.74; found C = 57.27, H = 7.54. <sup>1</sup>H-NMR: (250 MHz, CDCl<sub>3</sub>)  $\delta$  7.40 (s, 2H), 4.40-4.31 (q, 4H, *J* = 7.2 Hz), 4.20-4.16 (t, 4H, *J* = 5.2 Hz), 3.88-3.85 (t, 4H, *J* = 5.2), 3.76-3.72 (m, 4H), 3.68-3.54 (m, 8H), 3.53-3.35 (m, 4H), 3.07 (s, 6H), 1.41-1.35 (t, 6H, *J* = 7.2 Hz); <sup>13</sup>C-NMR (62.9 MHz, CDCl<sub>3</sub>)  $\delta$  165.34, 151.76, 125.04, 117.34, 71.77, 70.76, 70.51, 70.38, 69.73, 69.52, 61.10, 58.81, 14.13; IR (KBr) 2875 ( $\nu$  C-H), 1728 ( $\nu$  C=O), 1105 ( $\nu$ <sub>s</sub> C-O-C) cm<sup>-1</sup>.

**Bis-alcohol 12.** To a solution of bis-ester **11** (5.02 g, 9.2 mmol) in 30 ml of dry THF at 0 °C, a 1 M solution of LiAlH<sub>4</sub> (95 ml, 95 mmol) was added dropwise over a period of 1 h under a nitrogen atmosphere. The solution was heated to reflux for 30 min and then cooled to 0 °C. The excess of LiAlH<sub>4</sub> was quenched with ethyl acetate and water. The mixture was concentrated under reduced pressure and then diluted with water (50 ml). The product was extracted with CH<sub>2</sub>Cl<sub>2</sub> (3 x 50 ml) and dried over anhydrous MgSO<sub>4</sub>. The solvent was removed under reduced pressure. 3.96 g (93%) of **12** were isolated as a colorless oil. <sup>1</sup>H-NMR (250 MHz, CDCl<sub>3</sub>)  $\delta$  6.85 (s, 2H), 4.62 (s, 4H), 4.16-4.13 (m, 4H), 3.83-3.80 (m, 4H), 3.68-3.62 (m, 12H), 3.55-3.53 (m, 4H), 3.36 (s, 6H); <sup>13</sup>C-NMR (62.9 MHz, CDCl<sub>3</sub>)  $\delta$  151.32, 130.94, 114.57, 72.12, 70.85, 70.81, 70.76, 69.90, 69.09, 62.02, 59.20; IR (KBr) 3434 ( $\nu$  O-H), 2874 ( $\nu$  C-H), 1502 ( $\nu$  C=C), 1200 ( $\delta$  C-H,  $\delta$  O-H), 1061 ( $\nu$  C-O-C) cm<sup>-1</sup>; ESI-MS: C<sub>22</sub>H<sub>38</sub>O<sub>10</sub> (m/z) = 485 [M + Na]<sup>+</sup>.

**Dibromobenzyl derivative 13.** To a solution of bis-alcohol **12** (2.0 g, 4.3 mmol) in 30 ml of dry THF at 0 °C under a nitrogen atmosphere, a solution of PBr<sub>3</sub> (2.91 g, 10.8 mmol) in 5 ml of dry THF was added dropwise over a period of 20 min. The resulting solution was stirred for 1 h at 0 °C and then heated to reflux for 4 h. The solvent was removed under reduced pressure and the crude

product purified by flash column chromatography (SiO<sub>2</sub>, eluent: ethyl acetate/petroleum ether 6:4). 1.80 g (71%) of **13** were isolated as a yellow oil. A.E. calculated for C<sub>22</sub>H<sub>36</sub>O<sub>8</sub>Br<sub>2</sub> (588.3) C = 44.91, H = 6.16; found C = 45.07, H = 6.12. <sup>1</sup>H-NMR (250 MHz, CDCl<sub>3</sub>) δ 6.89 (s, 2H), 4.52 (s, 4H), 4.18-4.15 (t, 4H, *J* = 4.7 Hz), 3.89-3.85 (t, 4H, *J* = 4.7 Hz), 3.76-3.74 (m, 4H), 3.70-3.65 (m, 8H), 3.56-3.54 (m, 4H), 3.38 (s, 6H); <sup>13</sup>C-NMR (62.9 MHz, CDCl<sub>3</sub>) δ 150.68, 127.94, 115.36, 71.87, 70.84, 70.64, 70.51, 69.67, 68.95, 58.97, 28.41; IR (KBr) 2872 (ν C-H), 1506 (ν C=C), 1225 (δ C-H), 1105 (δ C-Br), 1058 (ν C-O-C) cm<sup>-1</sup>.

**Bis-phosphonate 14.** Dibromobenzyl derivative **13** (1.60 g, 2.72 mmol) and triethylphosphite (1.13 g, 6.80 mmol) were brought to 150 °C for 3 h. The crude product was purified by flash column chromatography (SiO<sub>2</sub>, eluent: ethyl acetate/petroleum ether 1:1, then ethyl acetate/ethanol 9:1). 1.60 g (84%) of **14** were isolated as a colorless oil. A.E. calculated for C<sub>30</sub>H<sub>56</sub>O<sub>14</sub>P<sub>2</sub> (702.7) C = 51.28, H = 8.03; found C = 50.96, H = 7.89. <sup>1</sup>H-NMR (250 MHz, CDCl<sub>3</sub>) δ 6.87 (s, 2H), 4.07-3.93 (m, 12H), 3.79-3.75 (m, 4H), 3.69-3.58 (m, 12H), 3.52-3.48 (m, 4H), 3.35 (s, 6H), 3.22-3.12 (d, 4H, *J* = 25.0 Hz), 1.20-1.15 (t, 12H, *J* = 6.8 Hz); <sup>13</sup>C-NMR (62.9 MHz, CDCl<sub>3</sub>) δ 150.32, 119.93-119.84 (d, *J*<sub>CP</sub> = 5.0 Hz), 115.36, 71.72, 70.56, 70.54, 70.35, 69.63, 68.58, 61.80-61.70 (d, *J*<sub>CP</sub> = 6.4 Hz), 58.81, 27.27-25.05 (d, *J*<sub>CP</sub> = 139.0 Hz), 16.25-16.19 (d, *J*<sub>CP</sub> = 6.3 Hz); IR (KBr) 2874 (ν C-H), 1249 (ν O-P=O), 1213 (ν P-O-C), 1053 (ν<sub>s</sub> C-O-C) cm<sup>-1</sup>

**FIGURE S1**

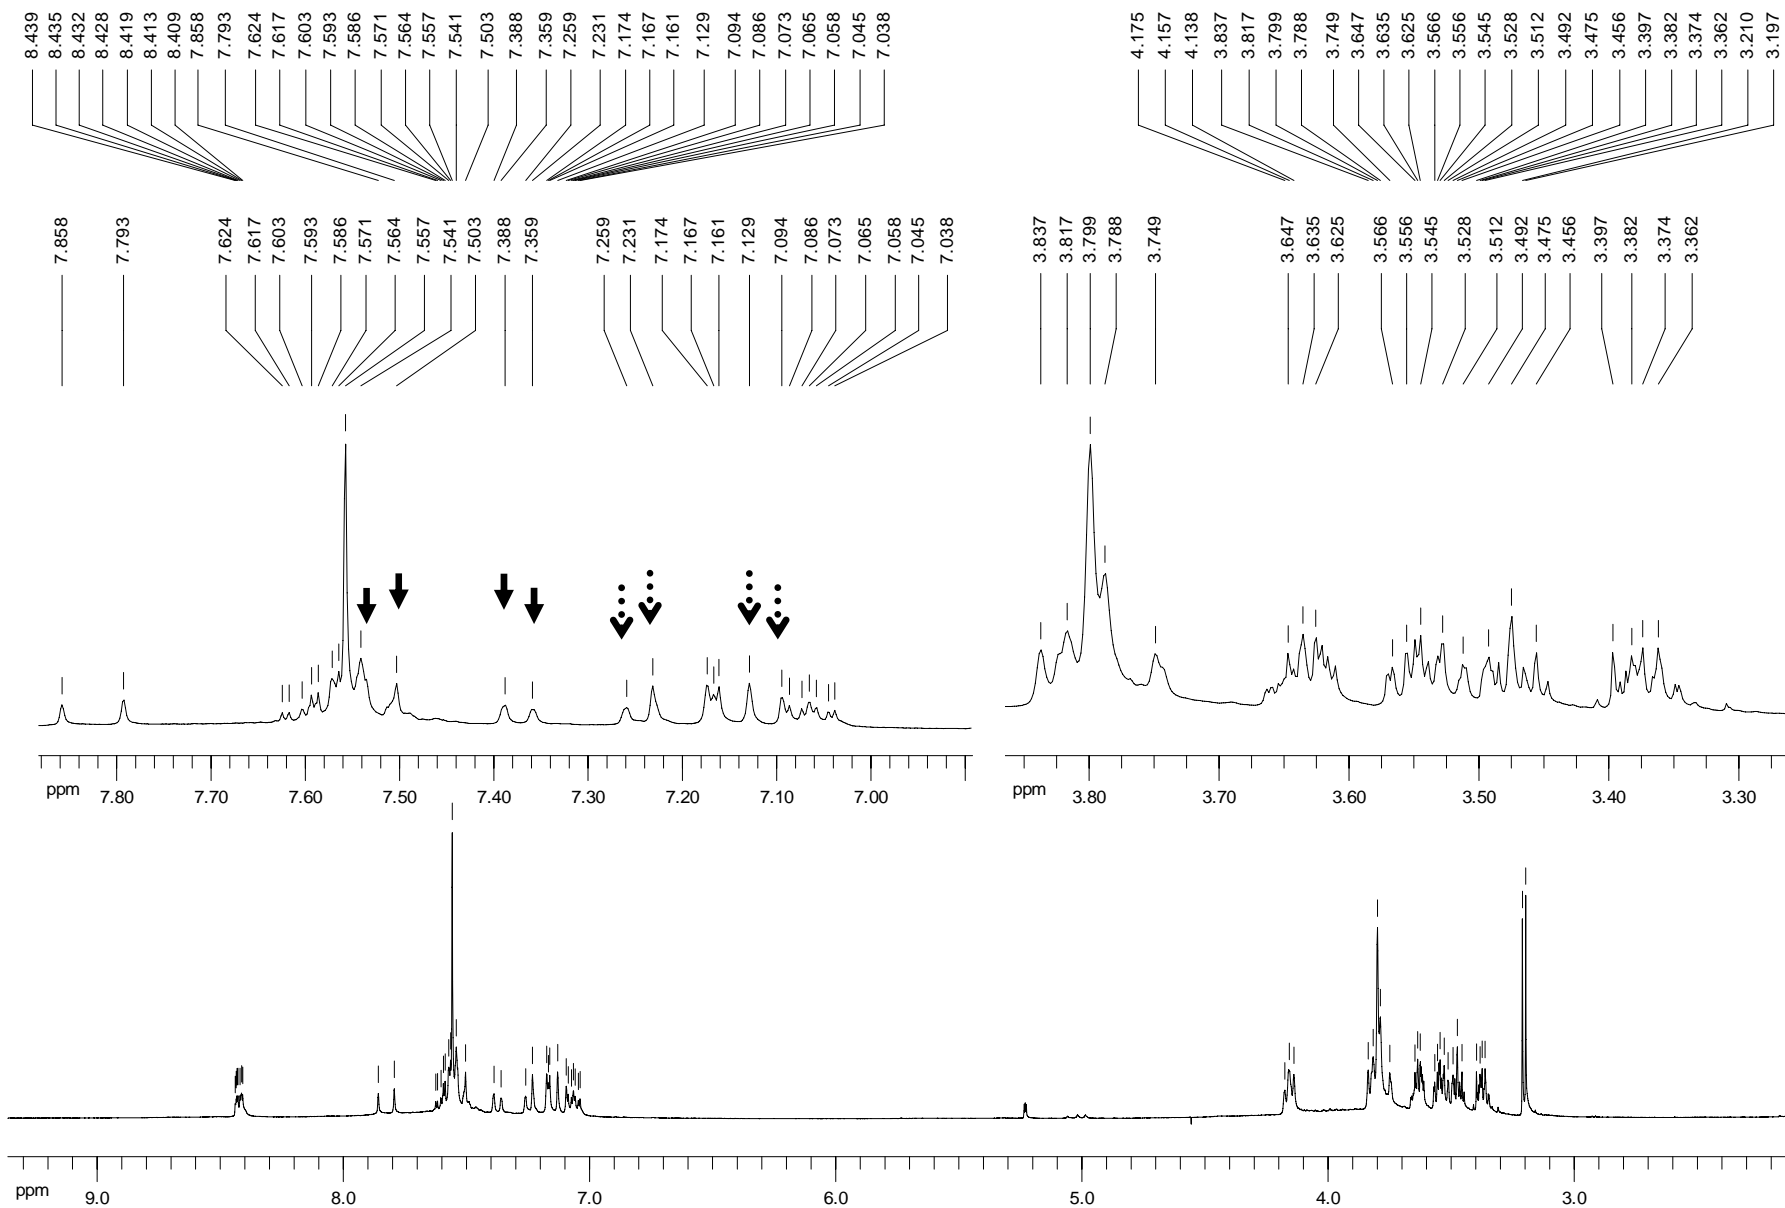

**FIGURE S2**

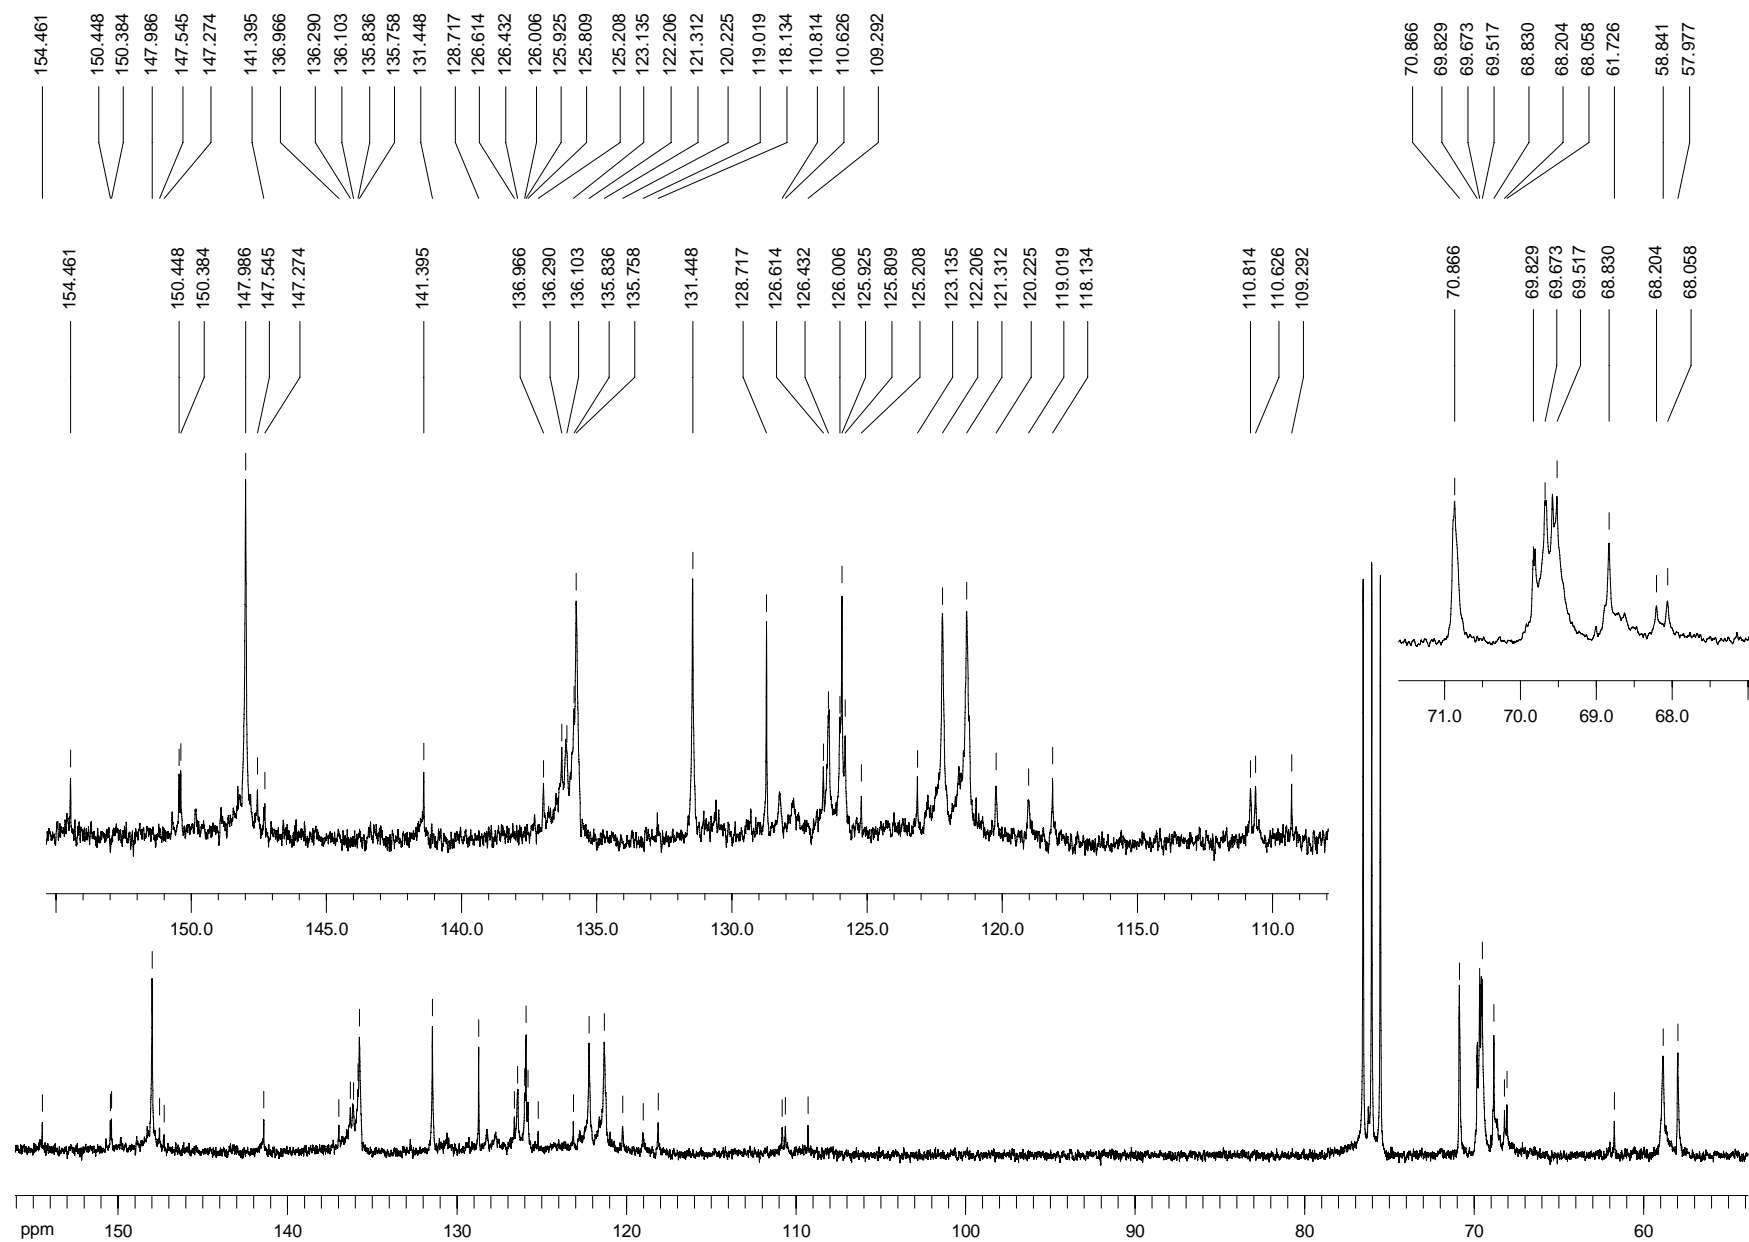



**FIGURE S3**

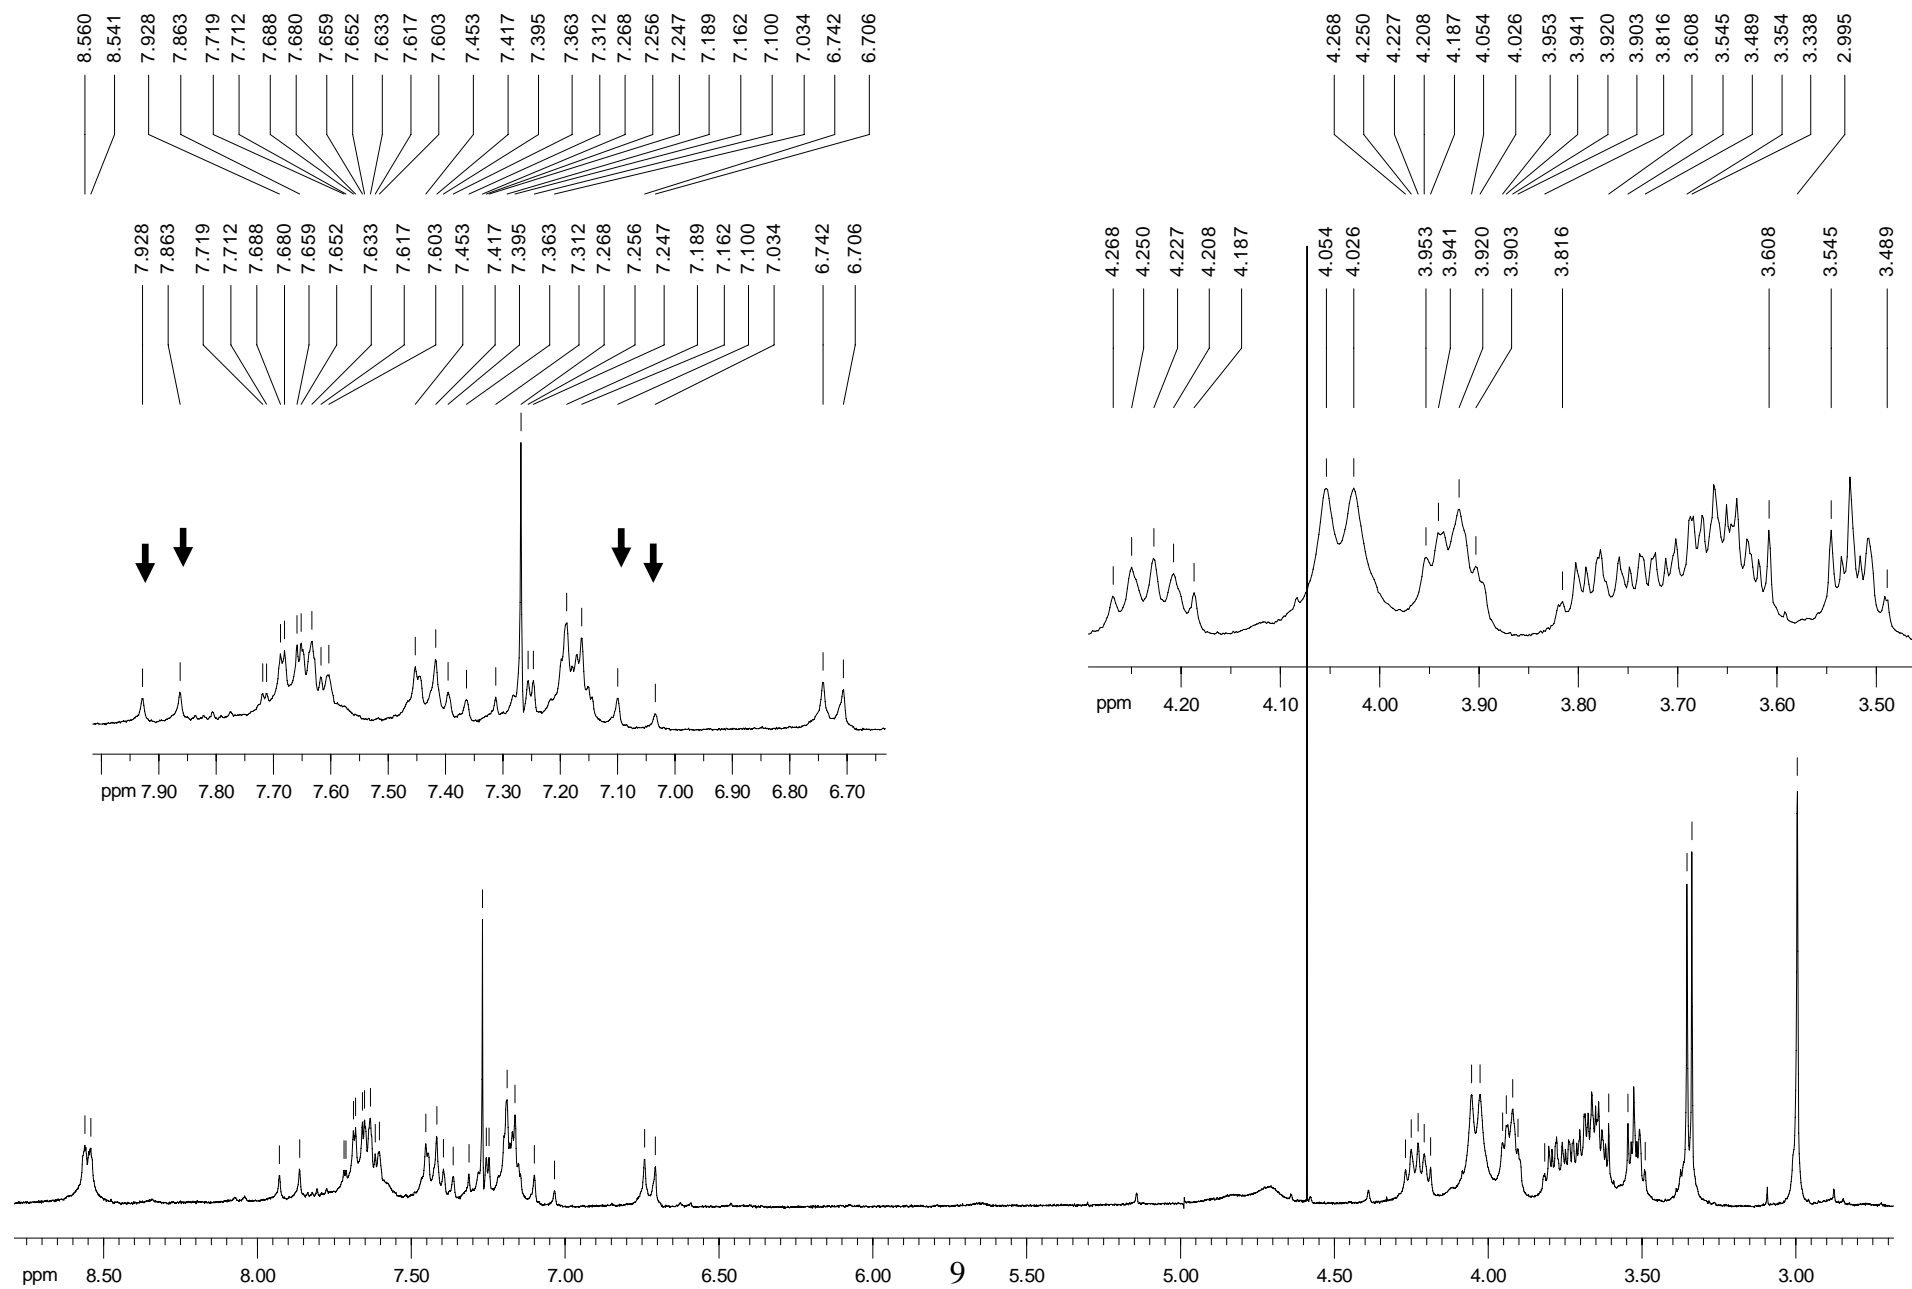

**FIGURE S4**

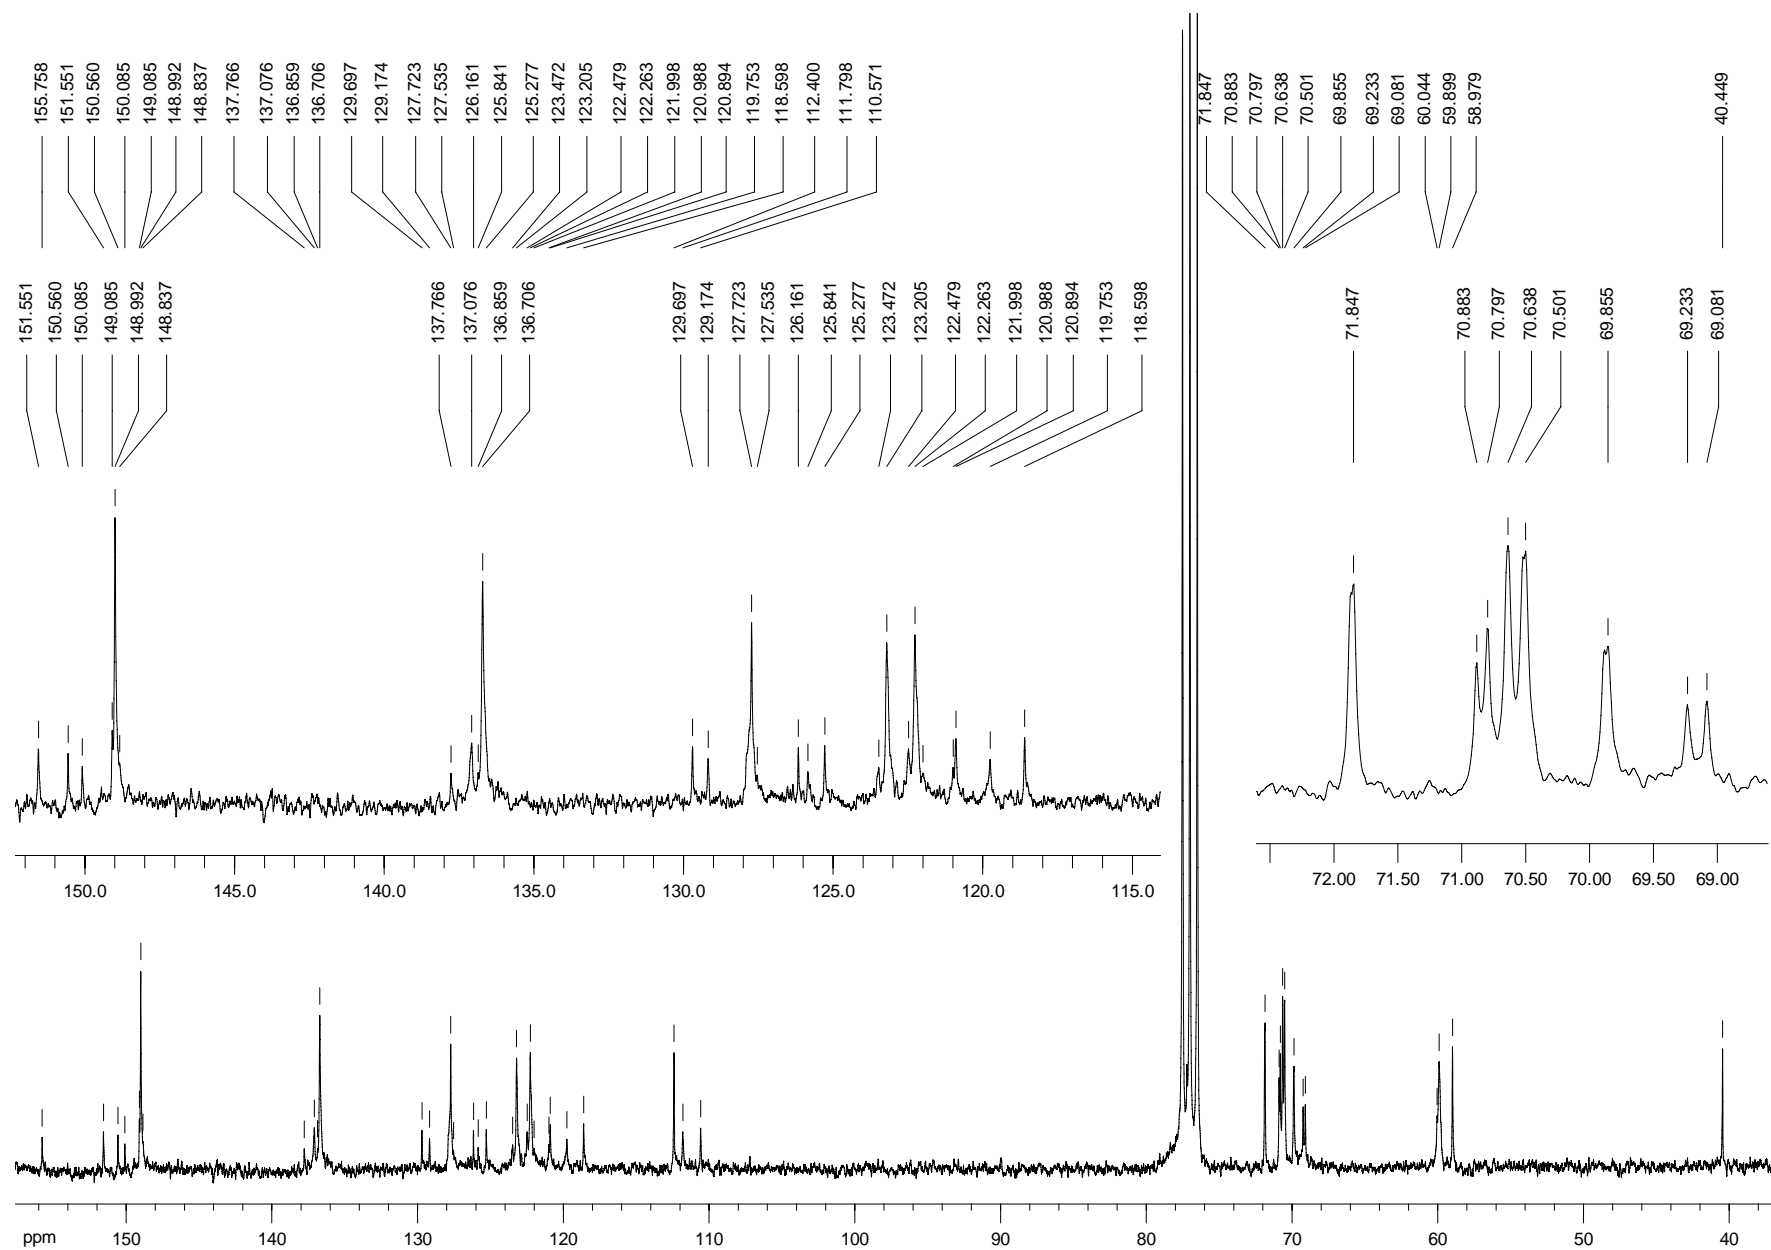

FIGURE S5

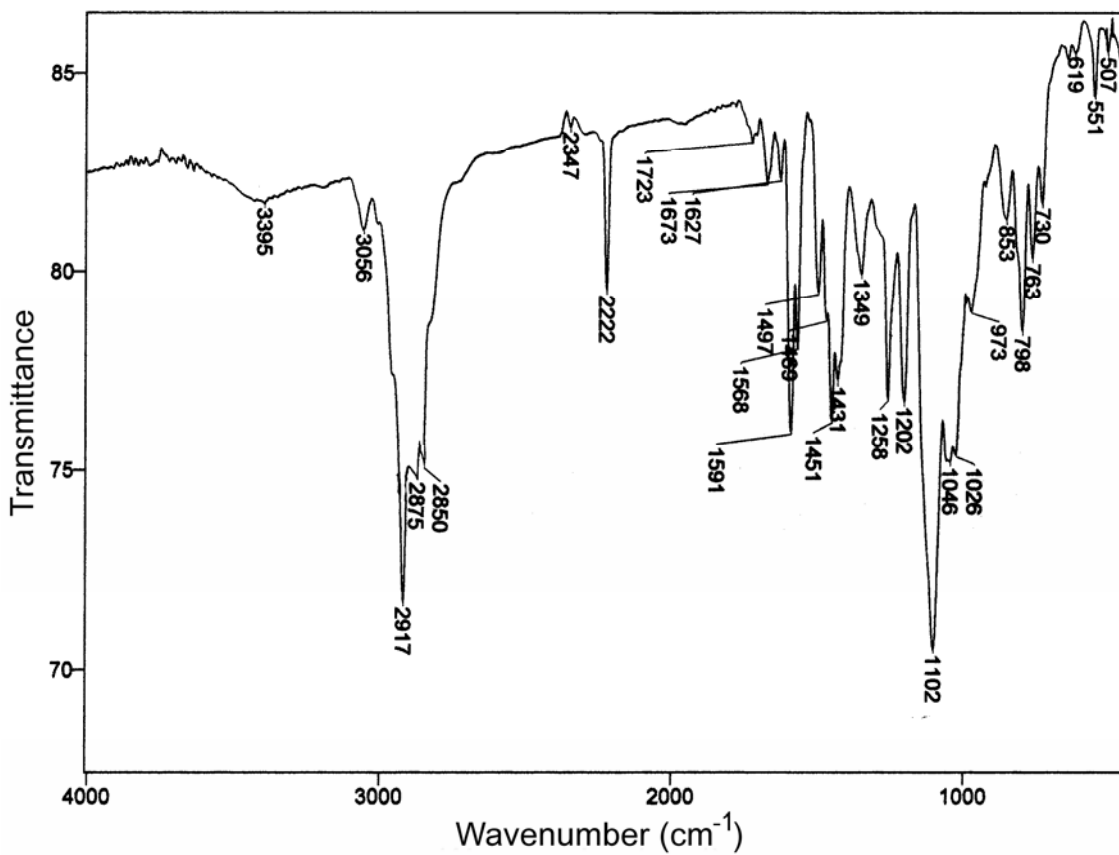

File # 1 : STPIR1

FIGURE S6

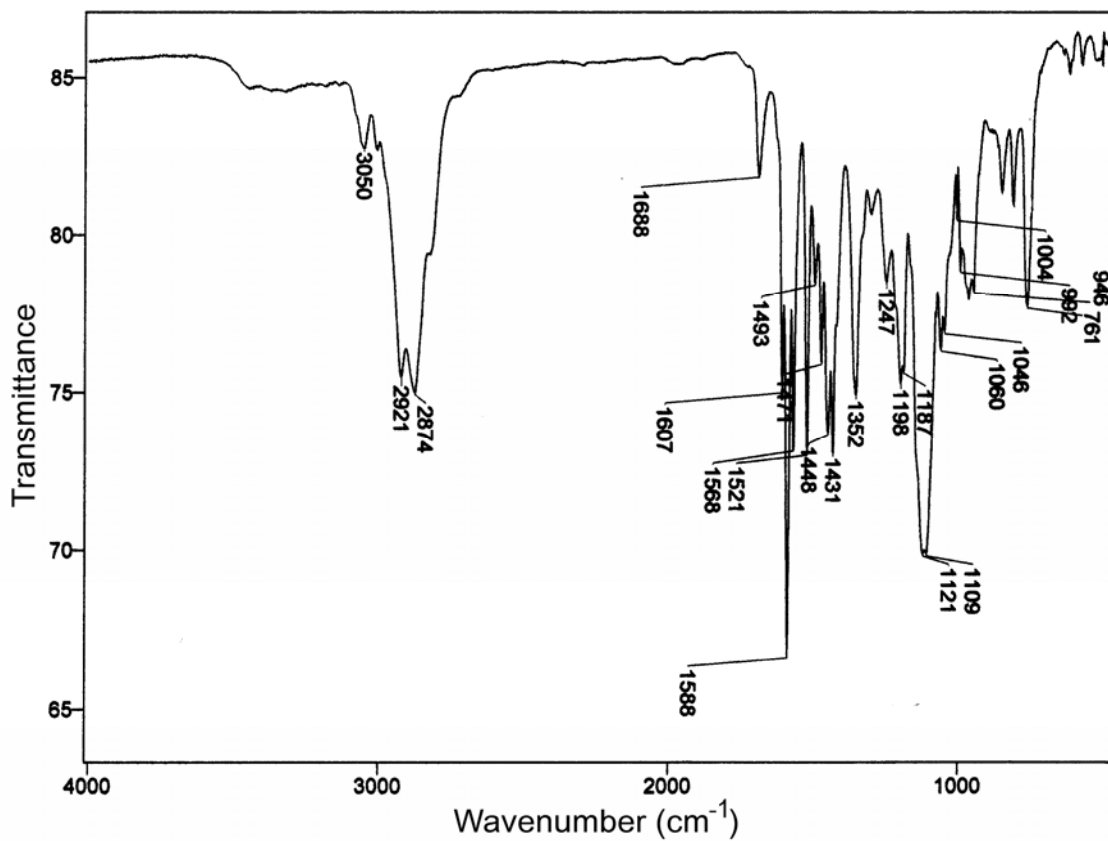

File # 1 : AMPIR

FIGURE S7

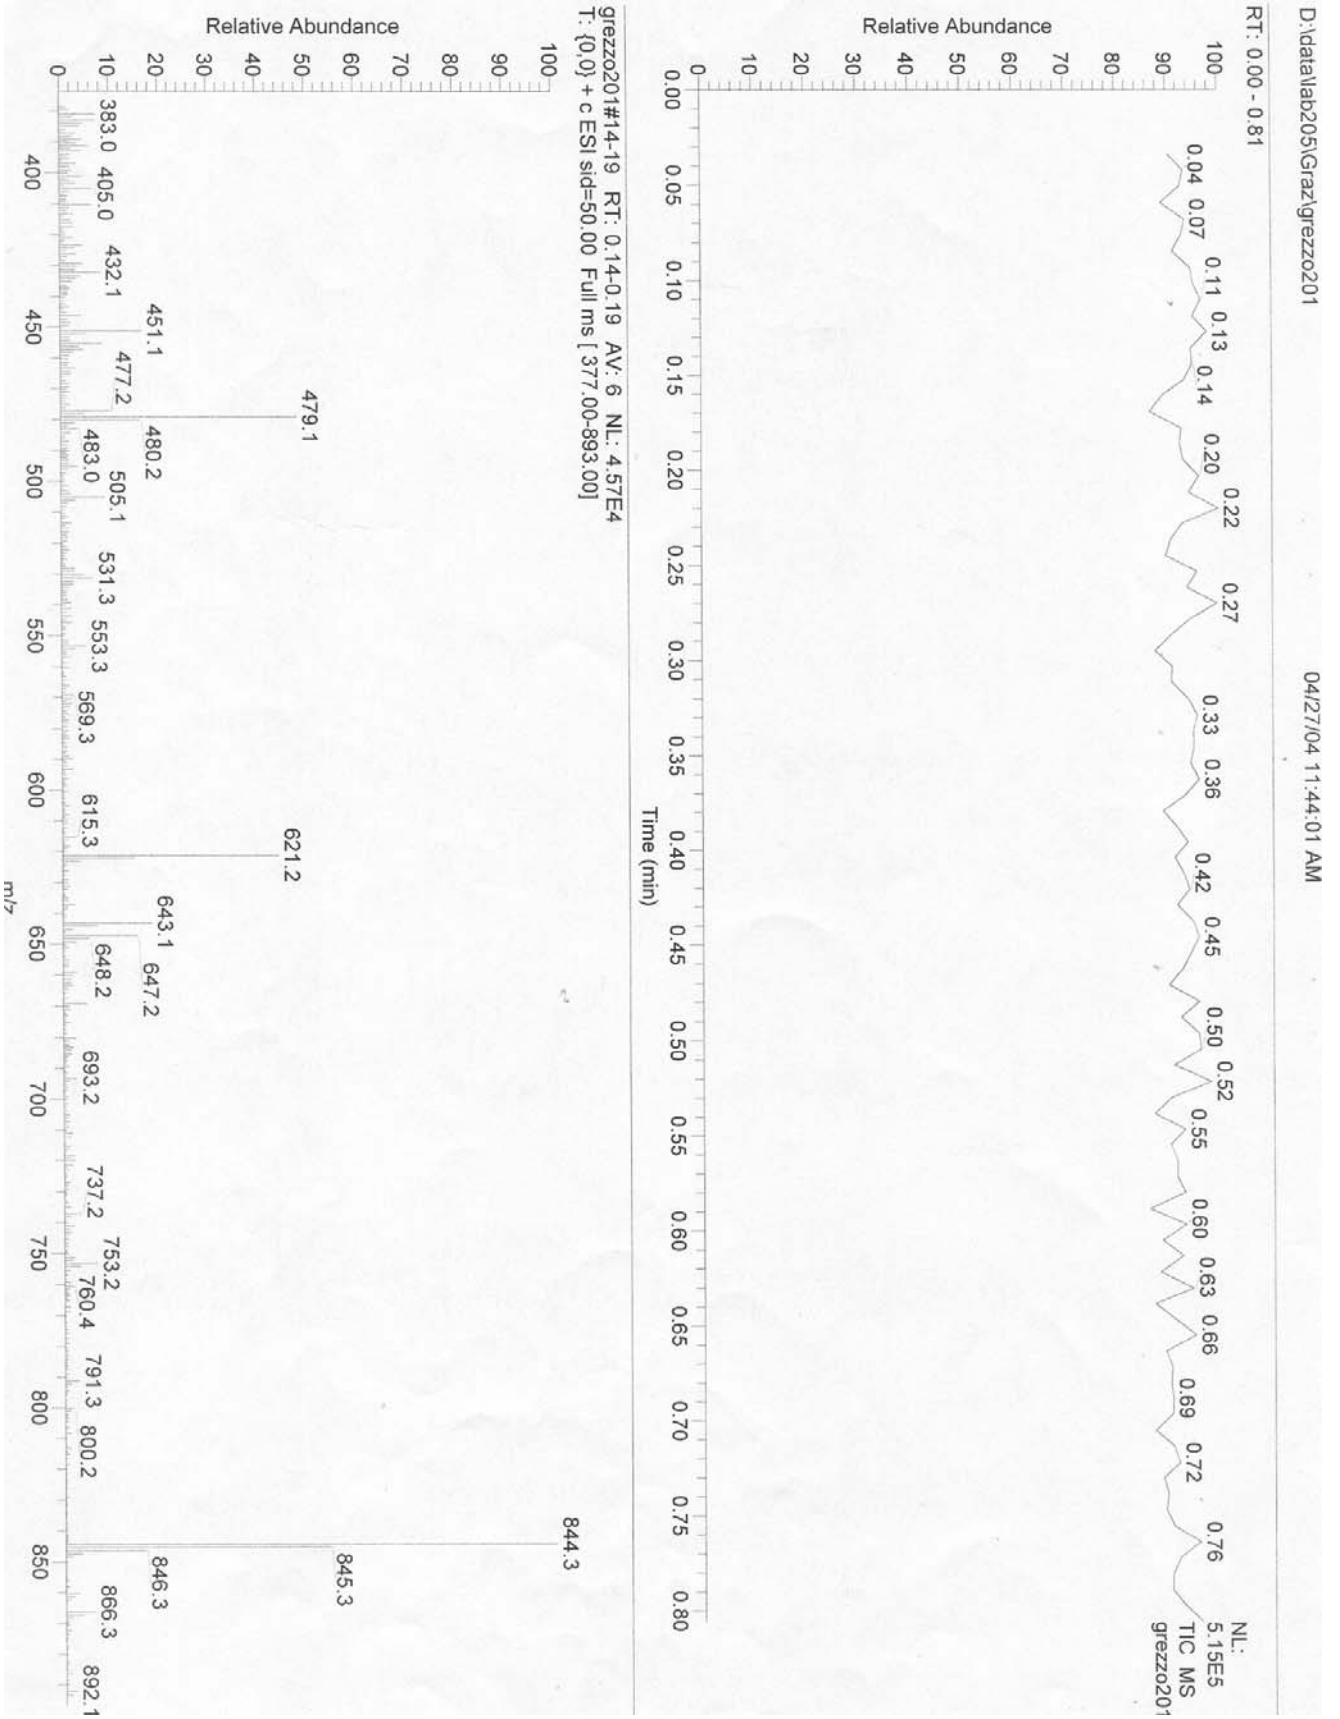

metpiro1\_040705141213 #81-84 RT: 0.70-0.73 AV: 4 NL: 3.59E3  
T: (0.0) + c ESI sid=30.00 Full ms [444.00-960.00]

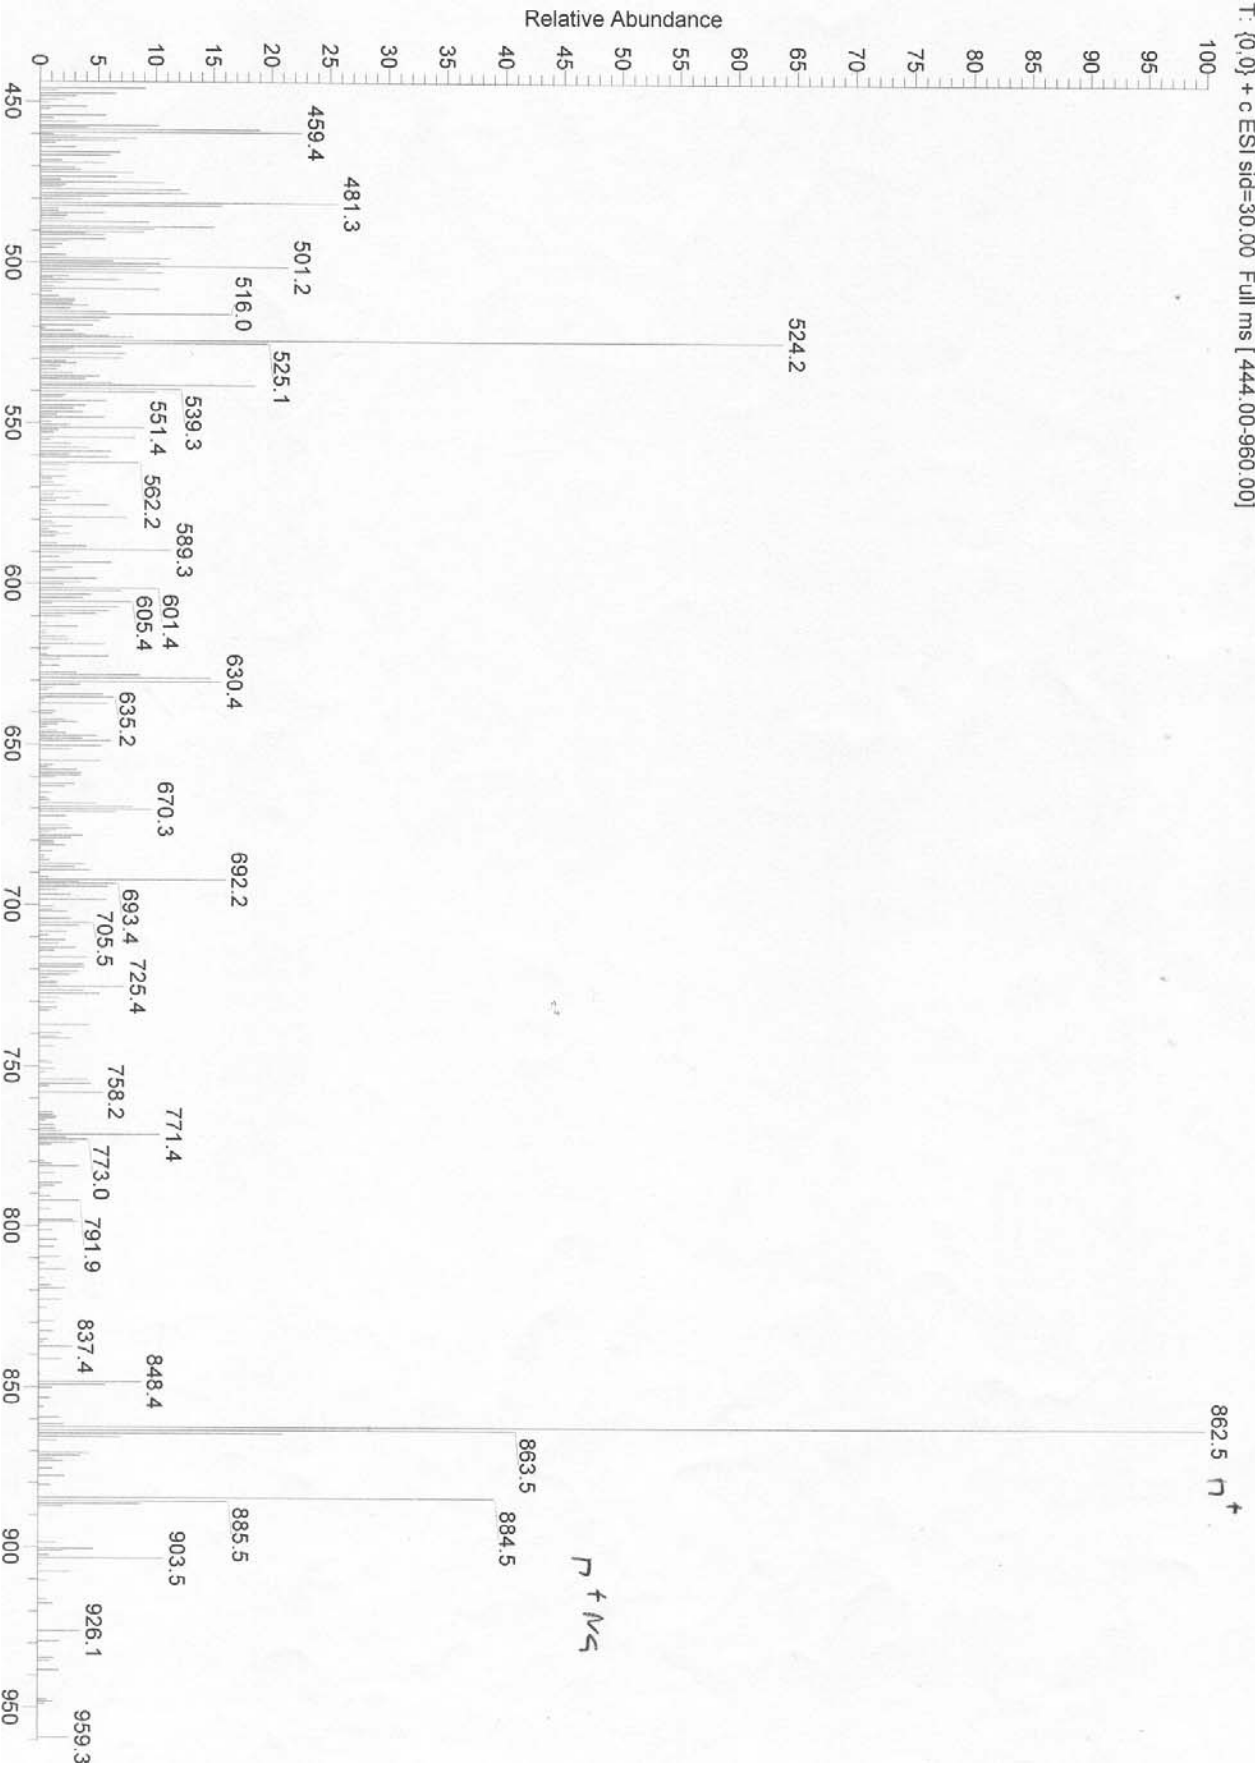

FIGURE S8

**FIGURE S9**

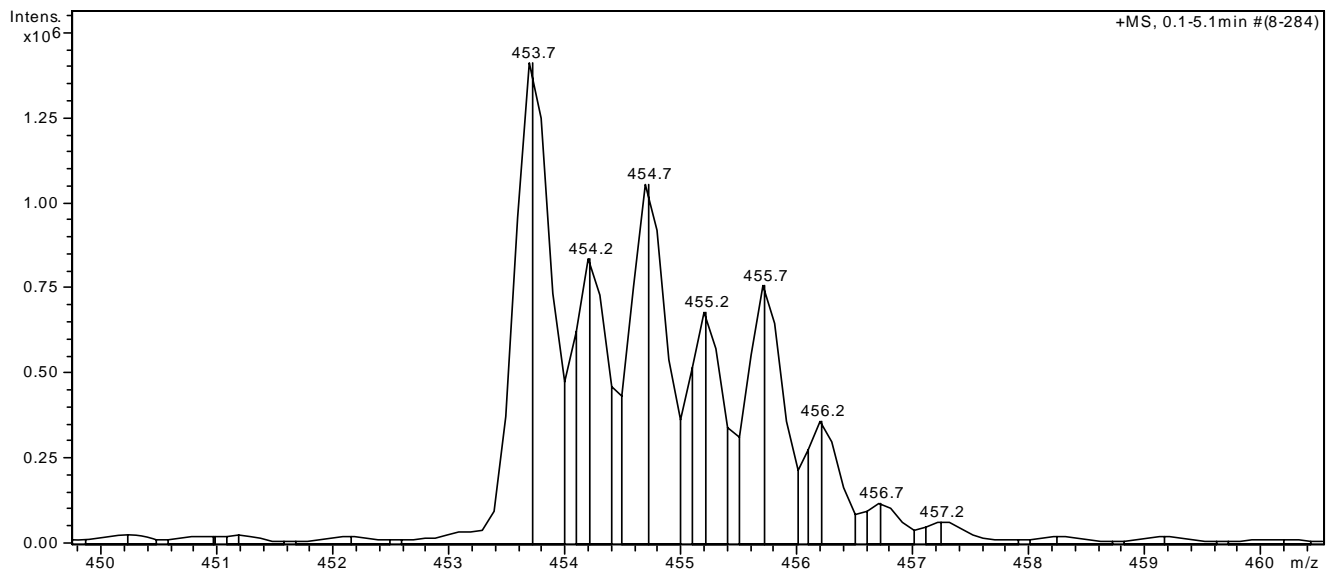

| m/z   | relative intensity (%) |
|-------|------------------------|
| 453.7 | 1409711 (100)          |
| 454.2 | 835890 (59.3)          |
| 454.7 | 1053838 (74.8)         |
| 455.2 | 681474 (48.3)          |
| 455.7 | 760059 (53.9)          |
| 456.2 | 359662 (25.5)          |
| 456.7 | 122393 (8.7)           |

**CALCULATED**

ISO:C49H57N5O8Zn

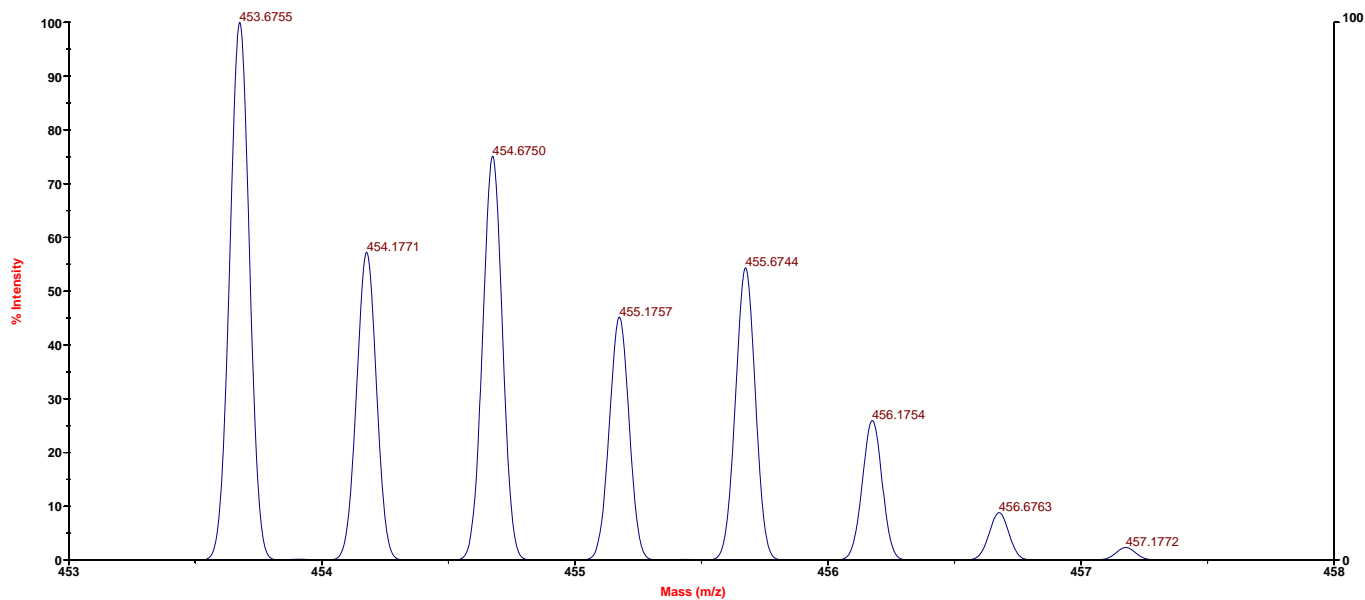

| m/z   | relative intensity (%) |
|-------|------------------------|
| 453.7 | 100.0                  |
| 454.2 | 57.2                   |
| 454.7 | 75.1                   |
| 455.2 | 45.2                   |
| 455.7 | 54.3                   |
| 456.2 | 25.6                   |
| 456.7 | 8.8                    |

**FIGURE S10**

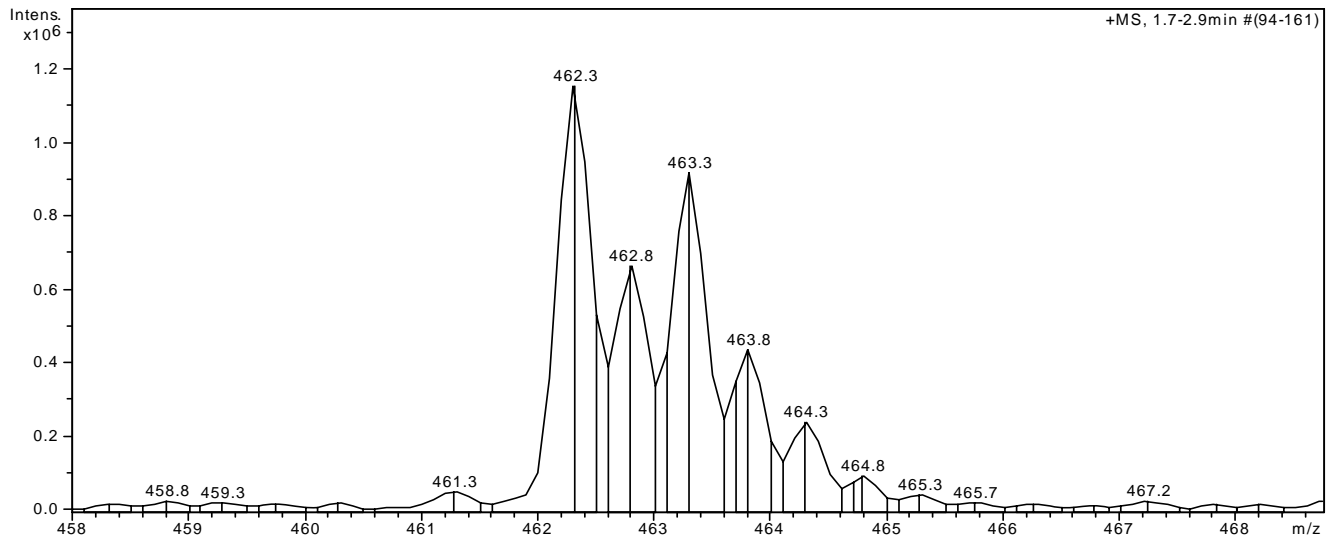

| m/z   | relative intensity (%) |
|-------|------------------------|
| 462.3 | 1155944 (100)          |
| 462.8 | 667345 (57.8)          |
| 463.3 | 919709 (79.6)          |
| 463.8 | 441130 (38.2)          |
| 464.3 | 245403 (21.2)          |
| 464.8 | 98008 (8.5)            |

**CALCULATED**

ISO:C50H63N5O8Zn

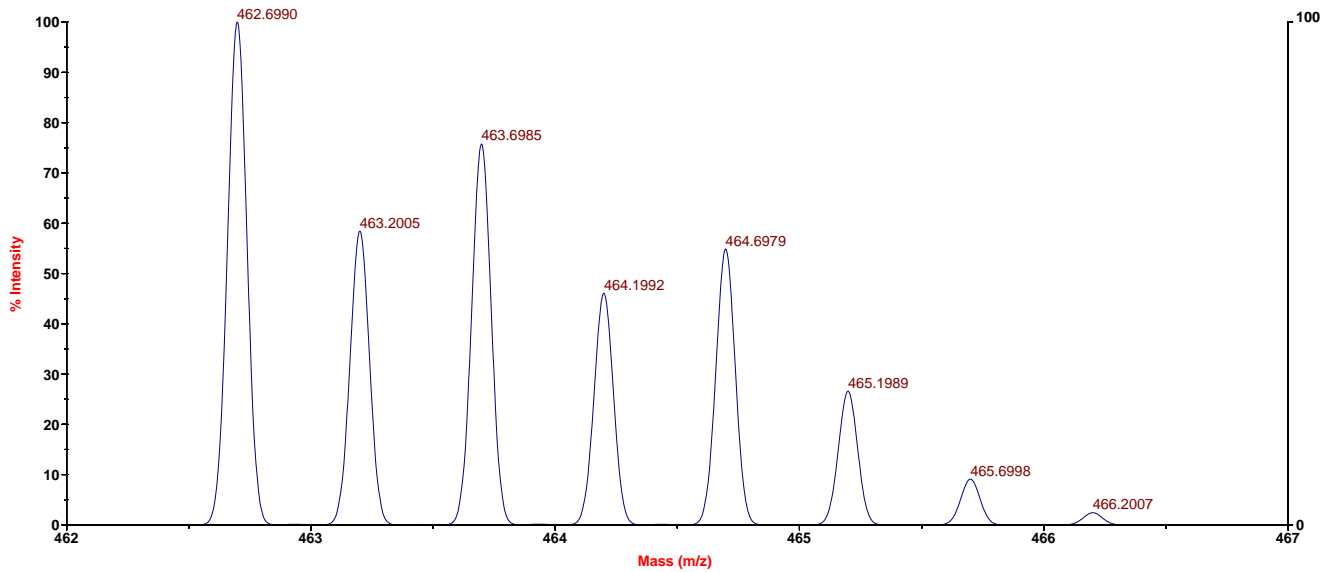

| m/z   | Relative Intensity (%) |
|-------|------------------------|
| 462.7 | 100                    |
| 463.2 | 58.4                   |
| 463.7 | 75.8                   |
| 464.2 | 46.1                   |
| 464.7 | 54.9                   |
| 465.2 | 26.6                   |
| 465.7 | 9.2                    |

## Spectrophotometric titrations

Zn(ClO<sub>4</sub>)<sub>2</sub>•6H<sub>2</sub>O was an analytical grade product from Aldrich. Zn<sup>2+</sup> stock solutions were titrated against EDTA following standard procedures (ammonium buffer at pH = 10 and Eriochrome Black T as indicator). Solutions for spectrophotometric measurements and titrations were prepared using HPLC-grade CH<sub>3</sub>CN.

The binding constant determination for **2**-Zn<sup>2+</sup> and **3**-Zn<sup>2+</sup> was performed by plotting the fluorescence changes as a function of [Zn<sup>2+</sup>] (see figure S12). Fitting of the titration curves was carried out with the software package Scientist 2.01 [1]. A model involving the formation of a 1:1 complex of Zn<sup>2+</sup> with **2** and **3** was used. Total concentration of **2** and **3** was set as invariable parameter.

[1] Scientist 2.01, Micromath Scientific Software, Salt Lake City, 1995.



**FIGURE S11**

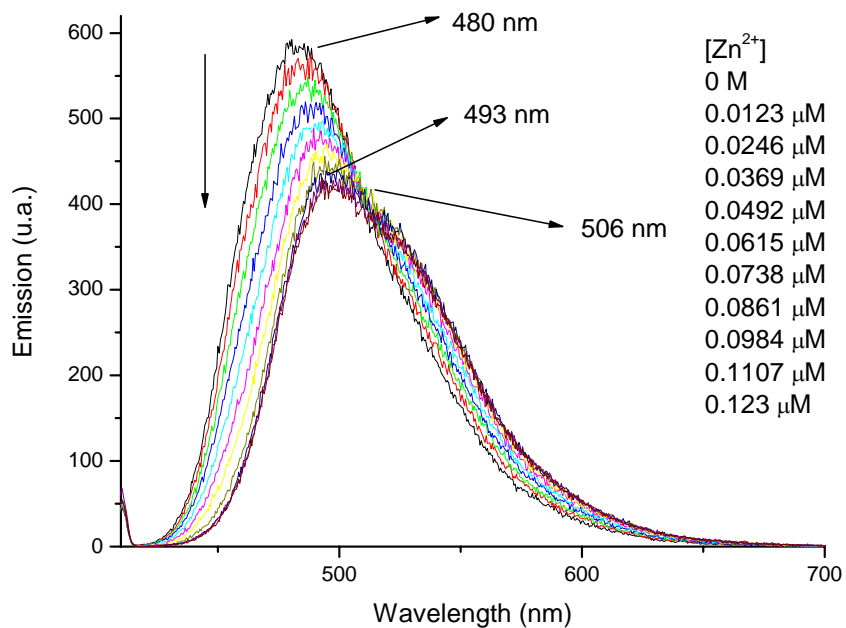

Fluorescence spectral changes observed upon the addition of  $\text{Zn}(\text{ClO}_4)_2 \cdot 6\text{H}_2\text{O}$  to 0.099  $\mu\text{M}$  of **2** in  $\text{CH}_3\text{CN}$ .  $\lambda_{\text{exc}} = 413 \text{ nm}$ .

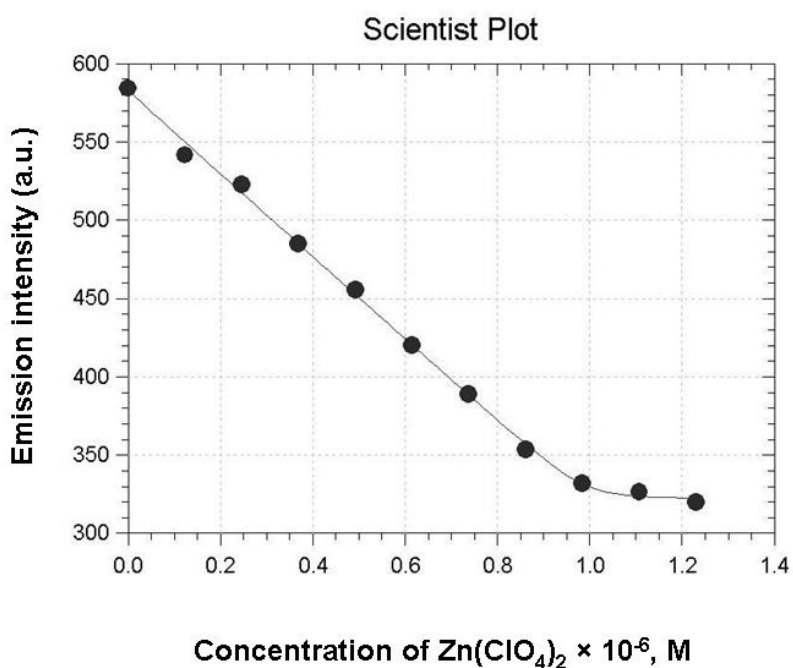

Change in the emission intensity as a function of  $[\text{Zn}^{2+}]$  for **2**. The apparent dissociation constant ( $\text{pK}_d > 7$ ) for  $\text{Zn}^{2+}$  was calculated from the above data with the software package Scientist 2.01.

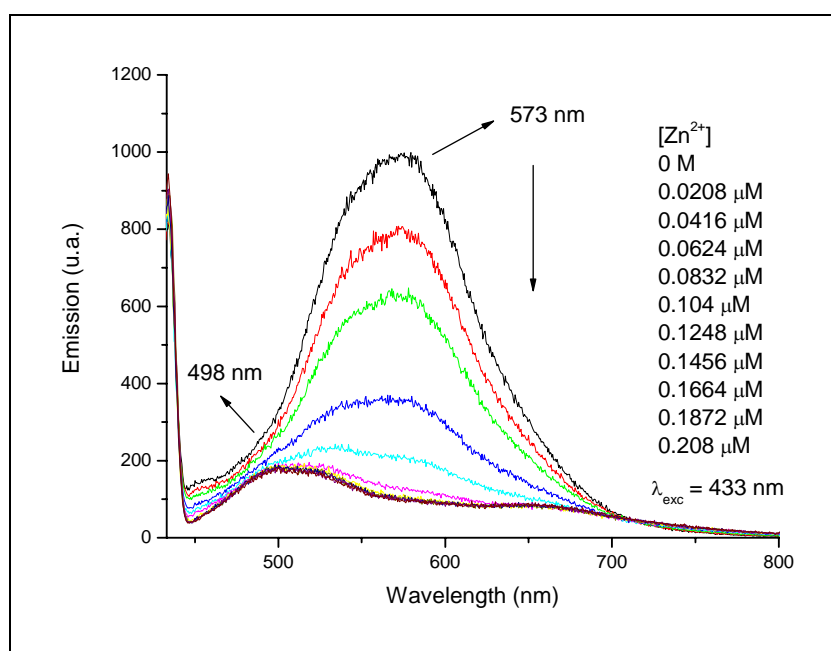

Fluorescence spectral changes observed upon the addition of  $\text{Zn}(\text{ClO}_4)_2 \cdot 6\text{H}_2\text{O}$  to 0.104  $\mu\text{M}$  of **3** in  $\text{CH}_3\text{CN}$ .  $\lambda_{\text{exc}} = 433 \text{ nm}$ .

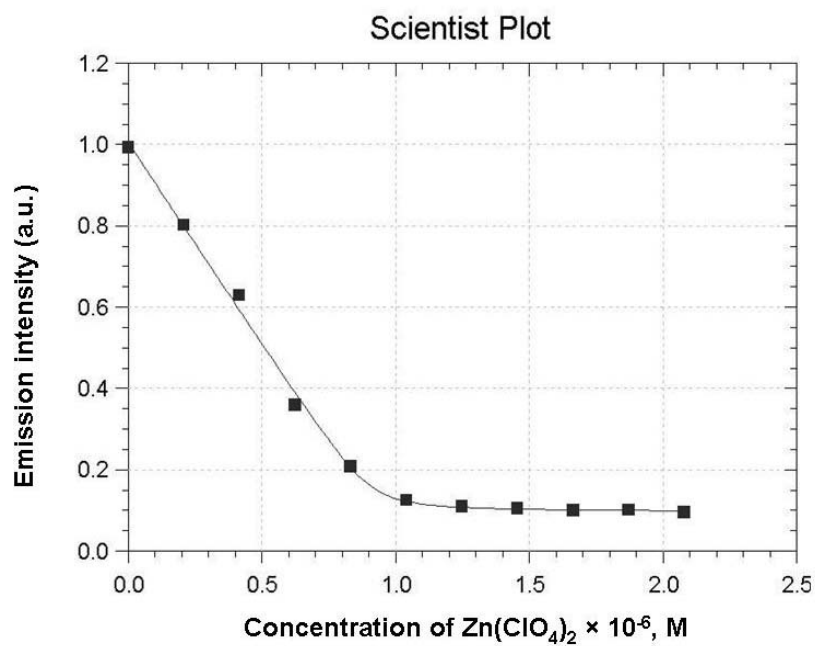

Change in the emission intensity as a function of  $[\text{Zn}^{2+}]$  for **3**. The apparent dissociation constant ( $\text{pK}_d > 7$ ) for  $\text{Zn}^{2+}$  was calculated from the above data with the software package Scientist 2.01.
